# Supplementary material for: Deep Eutectic Solvents as Efficient Media for the Extraction and Recovery of Cynaropicrin from Cynara cardunculus L. Leaves
Source: PubMed Central journal article supplement (PMC5713246; doi:10.3390/ijms18112276), 2017-10-30
Supplement: ijms-18-02276-s001.pdf [file ijms-18-02276-s001.pdf]

# Supplementary data

## Deep Eutectic Solvents as Efficient Media for the Extraction and Recovery of Cynaropicrin from *Cynara cardunculus* L. leaves

Emanuelle L.P. de Faria <sup>1</sup>, Rafael S. do Carmo <sup>1</sup>, Ana Filipa M. Cláudio <sup>1</sup>, Carmen S.R. Freire <sup>1</sup>, Mara G. Freire <sup>1</sup> and Armando J.D. Silvestre <sup>1,\*</sup>

<sup>1</sup> CICECO – Aveiro Institute of Materials, Chemistry Department, University of Aveiro, Campus de Santiago, 3810-193 Aveiro, Portugal

\*Corresponding author: armsil@ua.pt; tel: + 351 234370701; Fax: +351 234370084

**Table S1.** Prepared DES, HBD:HBA ratio and physical state at room temperature (ca. 25°C).

| Hydrogen bond donor     | Hydrogen bond Acceptor | HBD:HBA Ratio   | Physical state |
|-------------------------|------------------------|-----------------|----------------|
| Decanoic acid           | Choline chloride       | 1:1 / 2:1 / 1:2 | Solid          |
| Hexanoic acid           | Choline chloride       | 2:1             | Solid          |
| Hexanoic acid           | Choline chloride       | 4:1             | Solid          |
| Hexanoic acid           | [N <sub>2222</sub> ]Br | 2:1             | Solid          |
| Decanoic acid           | [N <sub>2222</sub> ]Br | 2:1             | Solid          |
| Hexanoic acid           | [N <sub>3333</sub> ]Br | 2:1             | Solid          |
| Decanoic acid           | [N <sub>3333</sub> ]Br | 2:1             | Solid          |
| Butanoic acid           | [N <sub>4444</sub> ]Br | 2:1             | Liquid         |
| Butanoic acid           | [N <sub>4444</sub> ]Br | 1:1             | Liquid         |
| Butanoic acid           | [N <sub>4444</sub> ]Br | 1:2             | Solid          |
| Caprylic acid/ hexanoic | [N <sub>4444</sub> ]Br | 1:1             | Liquid         |
| Caprylic acid/ hexanoic | [N <sub>4444</sub> ]Br | 2:1             | Liquid         |
| Caprylic acid/ hexanoic | [N <sub>4444</sub> ]Br | 1:2             | Solid          |
| Octanoic acid           | [N <sub>4444</sub> ]Br | 2:1             | Liquid         |
| Octanoic acid           | [N <sub>4444</sub> ]Br | 1:1             | Solid          |
| Octanoic acid           | [N <sub>4444</sub> ]Br | 1:2             | Solid          |
| Decanoic acid           | [N <sub>4444</sub> ]Br | 2:1             | Liquid         |
| Decanoic acid           | [N <sub>4444</sub> ]Br | 1:1             | Solid          |
| Decanoic acid           | [N <sub>4444</sub> ]Br | 1:2             | Solid          |

|                              |                        |     |        |
|------------------------------|------------------------|-----|--------|
| Lauric acid/ dodecanoic      | [N <sub>4444</sub> ]Br | 2:1 | Liquid |
| Lauric acid/ dodecanoic      | [N <sub>4444</sub> ]Br | 1:1 | Solid  |
| Lauric acid/ dodecanoic      | [N <sub>4444</sub> ]Br | 1:2 | Solid  |
| Miristic acid/ tetradecanoic | [N <sub>4444</sub> ]Br | 2:1 | Solid  |
| Hexanoic acid                | [N <sub>2222</sub> ]Cl | 2:1 | Liquid |
| Decanoic acid                | [N <sub>2222</sub> ]Cl | 2:1 | Liquid |
| Caprilic acid / hexanoic     | [N <sub>3333</sub> ]Cl | 2:1 | Liquid |
| Caprilic acid/ Hexanoic      | [N <sub>3333</sub> ]Cl | 1:1 | Solid  |
| Caprilic acid/ Hexanoic      | [N <sub>3333</sub> ]Cl | 1:2 | Solid  |
| Decanoic acid                | [N <sub>3333</sub> ]Cl | 2:1 | Liquid |
| Lauric acid/ dodecanoic      | [N <sub>3333</sub> ]Cl | 2:1 | Liquid |
| Lauric acid/ dodecanoic      | [N <sub>3333</sub> ]Cl | 1:1 | Solid  |
| Lauric acid/ dodecanoic      | [N <sub>3333</sub> ]Cl | 1:2 | Solid  |
| Butanoic acid                | [N <sub>4444</sub> ]Cl | 2:1 | Liquid |
| Butanoic acid                | [N <sub>4444</sub> ]Cl | 1:1 | Solid  |
| Butanoic acid                | [N <sub>4444</sub> ]Cl | 1:2 | Solid  |
| Hexanoic acid                | [N <sub>4444</sub> ]Cl | 2:1 | Liquid |
| Hexanoic acid                | [N <sub>4444</sub> ]Cl | 1:1 | Solid  |
| Hexanoic acid                | [N <sub>4444</sub> ]Cl | 1:2 | Solid  |
| Octanoic acid                | [N <sub>4444</sub> ]Cl | 2:1 | Liquid |
| Octanoic acid                | [N <sub>4444</sub> ]Cl | 1:1 | Solid  |

|                        |                        |                 |        |
|------------------------|------------------------|-----------------|--------|
| Octanoic acid          | [N <sub>4444</sub> ]Cl | 1:2             | Solid  |
| Decanoic acid          | [N <sub>4444</sub> ]Cl | 2:1             | Liquid |
| Decanoic acid          | [N <sub>4444</sub> ]Cl | 1:1             | Liquid |
| Decanoic acid          | [N <sub>4444</sub> ]Cl | 1:2             | Solid  |
| 12-hydroxystearic acid | [N <sub>4444</sub> ]Br | 1:1 / 2:1 / 1:2 | Solid  |
| 12-hydroxystearic acid | [N <sub>3333</sub> ]Cl | 1:1 / 2:1 / 1:2 | Solid  |
| 12-hydroxystearic acid | Choline chloride       | 1:1 / 2:1 / 1:2 | Solid  |

**Table S2.** Weight fraction percentage (extraction yield, wt.%) of cynaropicrin from the leaves of *Cynara cardunculus L.* with several DES at different molar ratio and fixed conditions, S/L ratio= 1:10, T = 25°C and t = 120 min.

| DES                                         | Cynaropicrin (wt.%) |
|---------------------------------------------|---------------------|
| <b>But. Acid:[N<sub>4444</sub>]Br (2:1)</b> | 1.273 ± 0.003       |
| <b>But. Acid:[N<sub>4444</sub>]Br (1:1)</b> | 0.138 ± 0.003       |
| <b>But. Acid:[N<sub>4444</sub>]Cl (2:1)</b> | 2.216 ± 0.036       |
| <b>But. Acid:[N<sub>2222</sub>]Cl (2:1)</b> | ND                  |
| <b>Pure But. Acid</b>                       | 1.175 ± 0.000       |
| <b>Hex. Acid:[N<sub>4444</sub>]Br (2:1)</b> | 1.405 ± 0.004       |
| <b>Hex. Acid:[N<sub>4444</sub>]Br (1:1)</b> | 0.498 ± 0.010       |
| <b>Hex. Acid:[N<sub>4444</sub>]Cl (2:1)</b> | 2.483 ± 0.017       |
| <b>Hex. Acid:[N<sub>2222</sub>]Cl (2:1)</b> | 0.518 ± 0.007       |
| <b>Pure Hex. Acid</b>                       | 1.944 ± 0.002       |

|                                        |               |
|----------------------------------------|---------------|
| Oct. Acid:[N <sub>4444</sub> ]Br (2:1) | 1.694 ± 0.016 |
| Oct. Acid:[N <sub>4444</sub> ]Br (1:1) | ND            |
| Oct. Acid:[N <sub>4444</sub> ]Cl (2:1) | 2.768 ± 0.023 |
| Oct. Acid:[N <sub>2222</sub> ]Cl (2:1) | ND            |
| Pure Oct. Acid                         | 2.083 ± 0.028 |
| Dec. Acid:[N <sub>4444</sub> ]Br (1:1) | ND            |
| Dec. Acid:[N <sub>4444</sub> ]Br (2:1) | 2.085 ± 0.001 |
| Dec. Acid:[N <sub>4444</sub> ]Cl (2:1) | 2.842 ± 0.014 |
| Dec. Acid:[N <sub>2222</sub> ]Cl (2:1) | 0.851 ± 0.003 |
| Pure Dec. Acid                         | ND            |

\*ND – Not determined.

**Table S3.** Weight fraction percentage (extraction yield, wt.%) of cynaropicrin from the leaves of *Cynara cardunculus L.* with decanoic acid:[N<sub>4444</sub>]Cl (2:1) at different temperatures and other fixed conditions (S/L ratio = 1:10 and t = 120 min).

| DES/Temperature                      | Cynaropicrin (wt.%) |               |               |
|--------------------------------------|---------------------|---------------|---------------|
|                                      | 25 °C               | 35 °C         | 45 °C         |
| Decanoic acid:[N <sub>4444</sub> ]Cl | 2.842 ± 0.014       | 2.473 ± 0.030 | 2.292 ± 0.022 |

**Table S4.** Weight fraction percentage (extraction yield, wt.%) of cynaropicrin from the leaves of *Cynara cardunculus L.* with decanoic acid:[N<sub>4444</sub>]Cl (2:1) in different extraction time and fixed conditions, S/L ratio = 1:10 and T = 25°C.

| DES/Extraction time                       | Cynaropicrin (wt.%) |               |               |               |               |               |               |
|-------------------------------------------|---------------------|---------------|---------------|---------------|---------------|---------------|---------------|
|                                           | 30 min              | 40 min        | 50 min        | 60 min        | 120 min       | 300 min       | 1440 min      |
| <b>Decanoic acid:[N<sub>4444</sub>]Cl</b> | 1.464 ± 0.005       | 1.614 ± 0.099 | 1.812 ± 0.052 | 3.130 ± 0.044 | 2.842 ± 0.014 | 2.295 ± 0.000 | 2.080 ± 0.042 |

**Table S5.** Optimization of weight fraction percentage of cynaropicrin extracted from the leaves of *Cynara cardunculus L.* with decanoic acid:[N<sub>4444</sub>]Cl (2:1) at solid-liquid ratio and other fixed conditions (T = 25°C and t = 60 min).

| DES/Solid-liquid ratio                    | Cynaropicrin (wt.%) |               |               |               |               |
|-------------------------------------------|---------------------|---------------|---------------|---------------|---------------|
|                                           | 1:10                | 1:20          | 1:30          | 1:40          | 1:50          |
| <b>Decanoic acid:[N<sub>4444</sub>]Cl</b> | 3.130 ± 0.044       | 3.853 ± 0.026 | 4.842 ± 0.086 | 4.942 ± 0.045 | 5.055 ± 0.117 |

**Table S6.** Weight fraction percentage (extraction yield, wt.%) of cynaropicrin from the leaves of *Cynara cardunculus L.* using aqueous solutions of decanoic acid:[N<sub>4444</sub>]Cl (2:1), and other fixed conditions (T = 25°C, S/L ratio = 1:30 and t = 60 min).

| DES/Added water (wt.%)                    | Cynaropicrin (wt.%) |               |               |               |               |               |               |               |               |               |               |               |
|-------------------------------------------|---------------------|---------------|---------------|---------------|---------------|---------------|---------------|---------------|---------------|---------------|---------------|---------------|
|                                           | 0                   | 5             | 10            | 20            | 30            | 40            | 50            | 60            | 70            | 80            | 90            | Pure water    |
| <b>Decanoic acid:[N<sub>4444</sub>]Cl</b> | 4.842 ± 0.086       | 4.896 ± 0.012 | 5.065 ± 0.080 | 5.134 ± 0.164 | 5.309 ± 0.021 | 5.431 ± 0.089 | 5.622 ± 0.030 | 5.832 ± 0.030 | 6.202 ± 0.048 | 3.188 ± 0.025 | 1.928 ± 0.056 | 0.676 ± 0.036 |

**Table S7.** Weight fraction percentage (extraction yield, wt.%) of cynaropicrin from the leaves of *Cynara cardunculus L.* with several solvents and decanoic acid:[N<sub>4444</sub>]Cl (2:1) (70 wt.% of water) at the following fixed conditions: S/L ratio = 1:30, t = 60 min and T = 25°C.

| Solvent                              | Cynaropicrin (wt.%) |
|--------------------------------------|---------------------|
| Decanoic acid:[N <sub>4444</sub> ]Cl | 6.202 ± 0.048       |
| n-hexane                             | 0.037 ± 0.010       |
| Acetone                              | 0.346 ± 0.045       |
| H <sub>2</sub> O                     | 0.676 ± 0.017       |
| Dichloromethane                      | 4.529 ± 0.266       |
| Soxhlet                              | 8.652 ± 0.407       |

**Table S8.** Weight fraction percentage (extraction yield, wt.%) of cynaropicrin from the leaves of *Cynara cardunculus L.* with the biomass recycle at fixed conditions (S/L ratio= 1:30, t = 60 min, T = 25°C).

| Cycle           | Cynaropicrin (wt.%) |
|-----------------|---------------------|
| 1 <sup>st</sup> | 6.202 ± 0.048       |
| 2 <sup>nd</sup> | 1.491 ± 0.003       |
| 3 <sup>rd</sup> | 0.732 ± 0.018       |
| 4 <sup>th</sup> | 0.351 ± 0.003       |
| 5 <sup>th</sup> | 0.103 ± 0.009       |
| 6 <sup>th</sup> | 0.097 ± 0.012       |

**Table S9.** Weight fraction percentage (extraction yield, wt.%) of cynaropicrin from the leaves of *Cynara cardunculus L.* with the aqueous solution of DES recycle at fixed conditions (S/L ratio = 1:30, t = 60 min and T = 25°C)

| Cycle           | Cynaropicrin (wt.%) |
|-----------------|---------------------|
| 1 <sup>st</sup> | 6.202 ± 0.048       |
| 2 <sup>nd</sup> | 6.664 ± 0.009       |
| 3 <sup>rd</sup> | 6.958 ± 0.109       |
| 4 <sup>th</sup> | 7.760 ± 0.093       |

**Table S10.** Amount of water (mL) added and e percentage of precipitation/recovery of cynaropicrin (0.5 mL of the DES-water solution used).

| Amount of water (mL) | Cynaropicrin recovery (%) |
|----------------------|---------------------------|
| 5                    | 38.26                     |
| 10                   | 48.28                     |
| 15                   | 52.51                     |
| 25                   | 65.70                     |
| 50                   | 73.61                     |
